# Supplementary material for: Increased hypothalamic microglial activation after viral-induced pneumococcal lung infection is associated with excess serum amyloid A production
Source: PubMed Central journal article supplement (PMC6035471; doi:10.1186/s12974-018-1234-1), 2018-07-06
Supplement: 12974_2018_1234_MOESM1_ESM.pdf [file 12974_2018_1234_MOESM1_ESM.pdf]

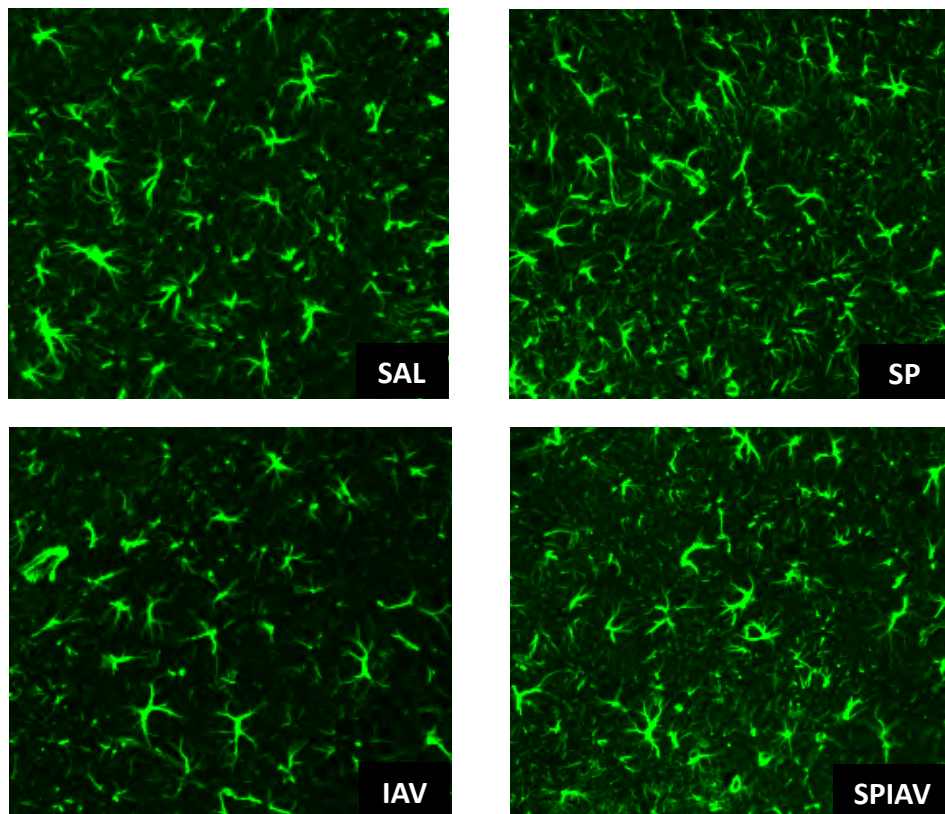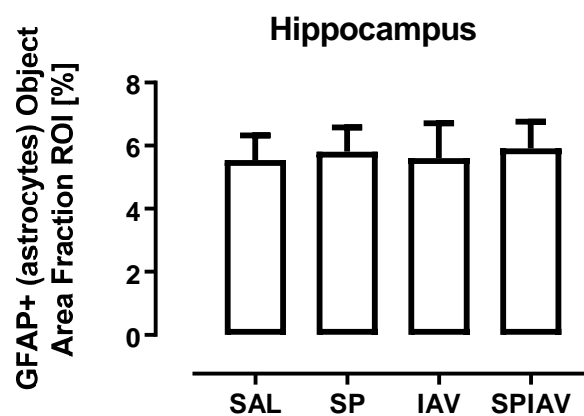

**Figure S1. Co-infection in the lung does not activate astrocytes in the hippocampus.** Brain sections containing hippocampus from saline (SAL), *S. pneumoniae* (SP), influenza A virus (IAV) or co-infection (SPIAV)-treated mice were immunolabelled for astrocytic marker GFAP (upper panel) and GFAP-positive area were quantified (lower panel). n = 5 – 6 with 3 – 4 sections from each brain.

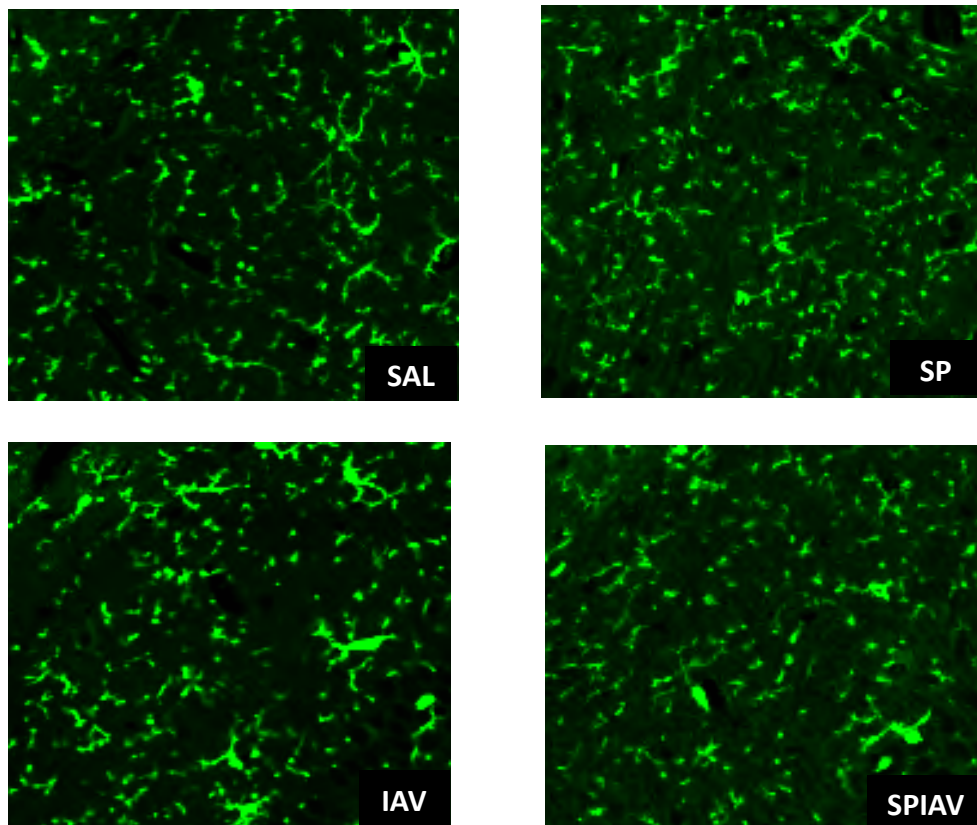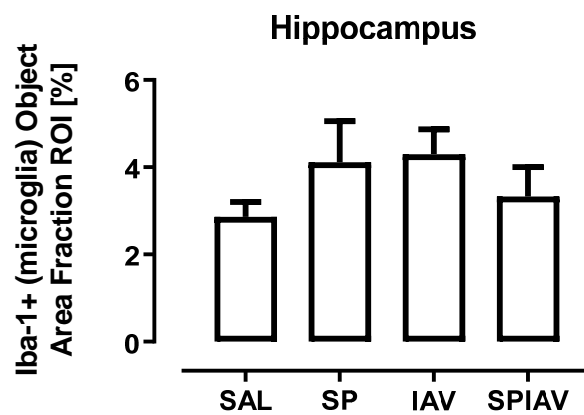

**Figure S2. Co-infection in the lung does not activate microglia in the hippocampus.** Brain sections containing hippocampus from saline (SAL), *S. pneumoniae* (SP), influenza A virus (IAV) or co-infection (SPIAV)-treated mice were immunolabelled for astrocytic marker GFAP (upper panel) and GFAP-positive area were quantified (lower panel). n = 5 – 6 with 3 – 4 sections from each brain.

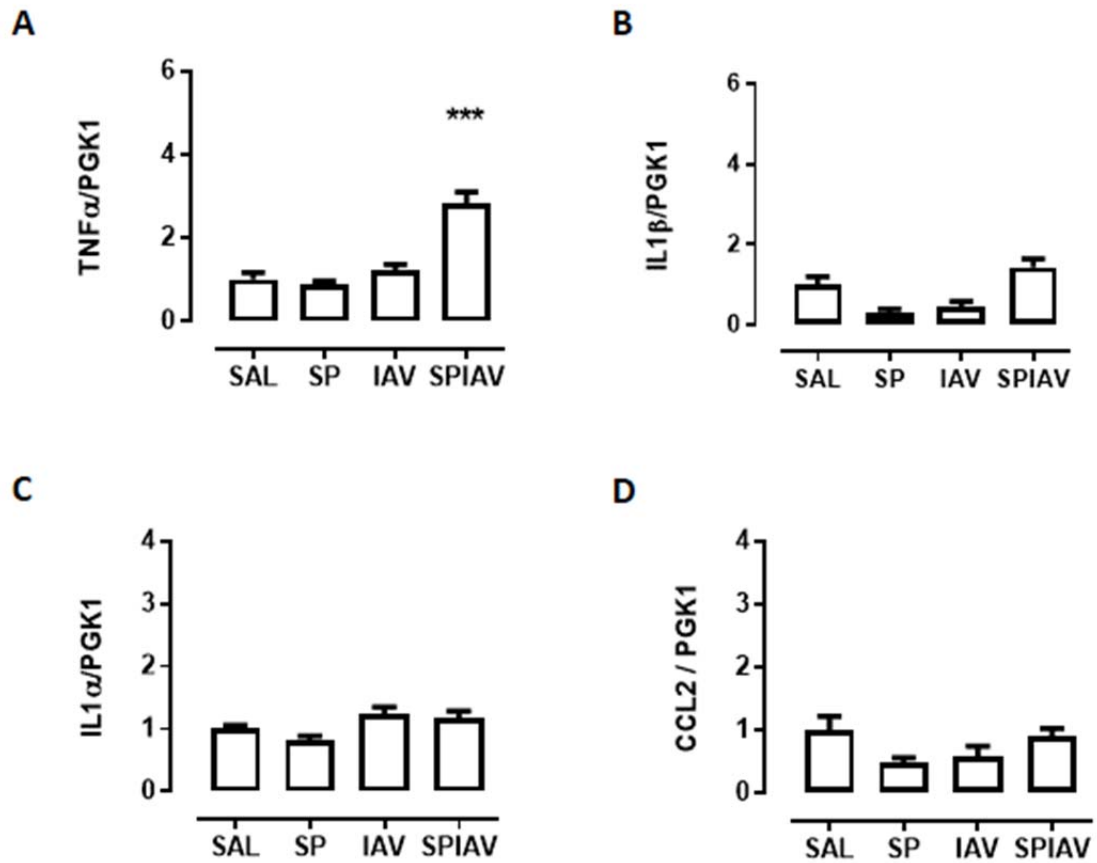

**Figure S3. Co-infection selectively increases TNF $\alpha$  gene expression in the hippocampus.**

The hippocampal region of the brains were dissected from mice treated with saline (SAL), *S. pneumoniae* (SP), influenza A virus (IAV) or co-infection (SPIAV). Gene expression of (A) TNF $\alpha$ , (B) IL-1 $\beta$ , (C) IL-6 and (D) CCL-2 was measured. n = 6 – 8; \*p<0.05, one-way ANOVA compared to SAL.

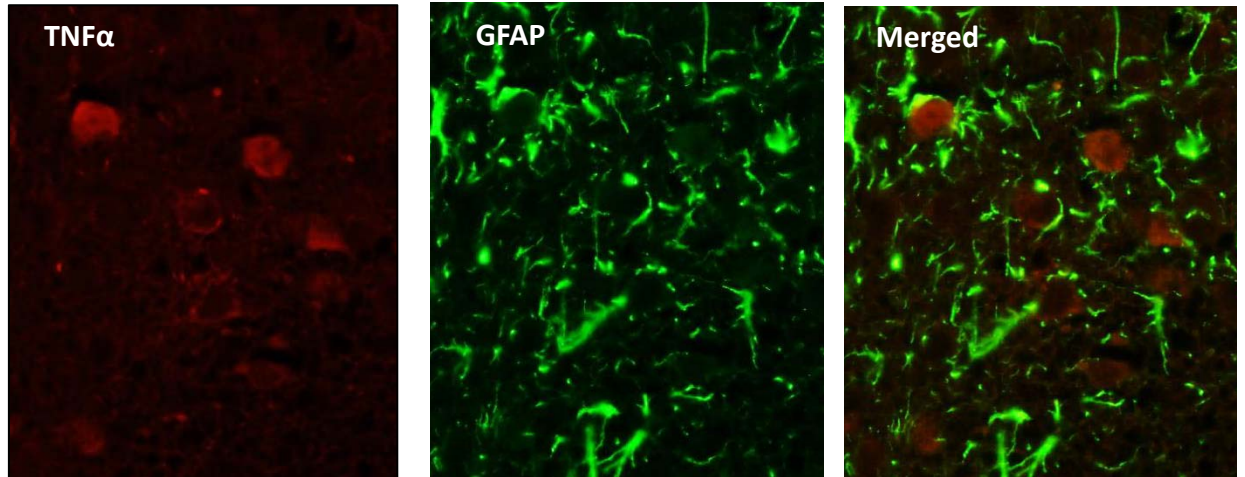

**Figure S4. TNF $\alpha$  does not co-localise with GFAP in the hypothalamus of co-infected mice.** Brain sections containing hypothalamus from co-infected mice (SPIAV) were double-stained for TNF $\alpha$  (red) and astrocytic marker GFAP (green) and images were merged for co-localisation.
